# Supplementary material for: Genomic and regulatory characteristics of significant transcription factors in colorectal cancer metastasis
Source: PubMed Central journal article supplement (PMC6292939; doi:10.1038/s41598-018-36168-8), 2018-12-13
Supplement: 41598_2018_36168_MOESM1_ESM.pdf [file 41598_2018_36168_MOESM1_ESM.pdf]

# Genomic and regulatory characteristics of significant transcription factors in colorectal cancer metastasis

Bin Zhou<sup>1\*</sup>, Rui Guo<sup>2</sup>

<sup>1</sup> School of Life Science, Tsinghua University, Beijing 100084, China

<sup>2</sup> Department of Biochemistry and Molecular biology, Shanxi Medical University, Taiyuan, China

<sup>1\*</sup> bin-zhou12@mails.tsinghua.edu.cn

<sup>2</sup> sxykdxgr@139.com



## **Supplementary Table S1**

Wilcoxon rank sum test for identifying differential expressed transcription factors in proteomics and transcriptomics datasets

## **Supplementary Table S2**

Copy number values and DNA methylation beta values of HNAF4A, HSF1, MECP2 and RAD21

## **Supplementary Table S3**

Potential cis-regulatory long non-coding RNAs for transcription factors

## **Supplementary Table S4**

Putative long non-coding RNAs regulating the activities of transcription factors

## **Supplementary Table S5**

Identification of 2258 target genes through multiple step selection

## **Supplementary Table S6**

Functional enrichment analyses and public literature retrieve results

## **Supplementary Table S7**

The Bayesian networks for each TF in non-metastatic and metastatic patient groups

## **Supplementary Table S8**

Elastic net algorithm selection, multivariate logistic and Cox regression results
